# Supplementary material
Source: PubMed Central journal article supplement (PMC8320478)
Supplement: jcsm.9118.ds001.pdf [file jcsm.9118.ds001.pdf]

|               | CPAP  | Age   | BMI   | MAP   | Hypertension | Smoking status | Dyslipidaemia |
|---------------|-------|-------|-------|-------|--------------|----------------|---------------|
| <b>CRAE</b>   |       |       |       |       |              |                |               |
| Controls      | -     | 0.634 | 0.979 | 0.851 | 0.991        | 0.483          | 0.977         |
| Mild-Moderate | 0.464 | 0.773 | 0.765 | 0.568 | 0.776        | 0.578          | 0.808         |
| Severe        | 0.012 | 0.463 | 0.793 | 0.353 | 0.302        | 0.204          | 0.952         |
| <b>CRVE</b>   |       |       |       |       |              |                |               |
| Controls      | -     | 0.470 | 0.110 | 0.396 | 0.422        | 0.245          | 0.275         |
| Mild-Moderate | 0.492 | 0.780 | 0.434 | 0.200 | 0.076        | 0.763          | 0.287         |
| Severe        | 0.475 | 0.892 | 0.797 | 0.674 | 0.990        | 0.761          | 0.573         |
| <b>AVR</b>    |       |       |       |       |              |                |               |
| Controls      | -     | 0.926 | 0.514 | 0.449 | 0.502        | 0.599          | 0.866         |
| Mild-Moderate | 0.374 | 0.921 | 0.352 | 0.116 | 0.066        | 0.554          | 0.135         |
| Severe        | 0.031 | 0.929 | 0.205 | 0.292 | 0.094        | 0.396          | 0.160         |

**Table S1:** Analysis of the effect of confounding factors on static retinal vessel caliber

Caption: Results of mixed ANOVA analysis of the interaction effect of various confounding factors on retinal vessel caliber between baseline and follow up. All values shown are *p* values.

|                | <b>CRAE</b> | <b>95% CI</b>    | <b>CRVE</b> | <b>95% CI</b>   | <b>AVR</b> | <b>95% CI</b>   | <b>SRAP</b> | <b>95% CI</b>   | <b>SRVP</b> | <b>95% CI</b>   |
|----------------|-------------|------------------|-------------|-----------------|------------|-----------------|-------------|-----------------|-------------|-----------------|
| CPAP           | 2.25        | -1.04 -<br>5.54  | -1.81       | -5.79 -<br>2.17 | 0.09       | -0.01 –<br>0.20 | 0.00        | -0.73 –<br>0.73 | 0.14        | -1.27 –<br>1.55 |
| No CPAP        | -2.57       | -5.09 --<br>0.06 | -1.41       | -4.19 -<br>1.36 | 0.01       | -0.03 –<br>0.06 | 0.02        | -0.67 –<br>0.71 | 0.22        | -0.61 –<br>1.05 |
| <b>P value</b> | 0.021       |                  | 0.867       |                 | 0.240      |                 | 0.569       |                 | 0.750       |                 |

**Table S2:** Comparison of net change in retinal vascular parameters between baseline and follow up, regardless of disease severity

Captions: Results of T-test analysis of net change in retinal vascular parameters (e.g. follow up CRAE minus baseline CRAE). Values not adjusted for confounding factors. All results in  $\mu\text{m}$

|                | CRAE  | 95% CI           | CRVE  | 95% CI           | AVR   | 95% CI          | SRAP  | 95% CI          | SRVP  | 95% CI          |
|----------------|-------|------------------|-------|------------------|-------|-----------------|-------|-----------------|-------|-----------------|
| <b>CPAP</b>    |       |                  |       |                  |       |                 |       |                 |       |                 |
| Controls       | -     | -                | -     | -                | -     | -               | -     | -               | -     | -               |
| Mild           | 4.94  | -2.55 –<br>12.43 | -7.71 | -13.55 –<br>1.87 | 0.05  | -0.02 –<br>0.12 | -0.11 | -0.44 –<br>0.22 | 0.07  | -0.69 –<br>0.83 |
| Moderate       | 0.58  | -6.83 –<br>7.99  | -0.39 | -6.29 –<br>5.51  | 0.00  | -0.05 –<br>0.05 | 0.11  | -0.22 –<br>0.44 | 0.09  | -0.77 –<br>0.95 |
| Severe         | 2.74  | -5.41 –<br>8.15  | -1.67 | -5.88 –<br>2.54  | 0.02  | -0.02 –<br>0.06 | 0.18  | -1.02 –<br>1.38 | 0.17  | -0.7 – 1.04     |
| <b>No CPAP</b> |       |                  |       |                  |       |                 |       |                 |       |                 |
| Controls       | 0.28  | -5.30 –<br>5.86  | -3.79 | -11.55 –<br>3.99 | 0.03  | -0.01 –<br>0.07 | 0.14  | -0.9 – 1.18     | 0.05  | -1.03 –<br>1.13 |
| Mild           | -1.42 | -8.65 –<br>5.81  | 1.45  | -6.71 –<br>9.61  | -0.01 | -0.04 –<br>0.02 | -0.10 | -0.82 –<br>0.62 | 0.34  | -1.53 –<br>2.21 |
| Moderate       | -0.04 | -6.21 –<br>6.08  | -2.25 | -12.36 –<br>7.86 | 0.06  | -0.14 –<br>0.26 | 0.05  | -0.55 –<br>0.65 | 0.34  | -0.45 –<br>1.13 |
| Severe         | -6.14 | -11.67 –<br>0.59 | -3.97 | -10.26 –<br>2.32 | -0.01 | -0.04 –<br>0.02 | -0.01 | -0.73 –<br>0.71 | 0.10  | -1.49 –<br>1.69 |
| <b>P value</b> | 0.040 |                  | 0.203 |                  | 0.748 |                 | 0.105 |                 | 0.779 |                 |

**Table S3:** Results of multivariate regression analysis

Caption: Values shown are the net change in retinal vascular parameters (e.g. follow up CRAE minus baseline CRAE), adjusted for age, BMI, hypertension, mean arterial pressure, smoking status and dyslipidaemia. All results in  $\mu\text{m}$
